# Warp Speed for Coronavirus Disease 2019 (COVID-19) Vaccines: Why Are Children Stuck in Neutral?

Evan J. Anderson,<sup>1,2,3</sup> James D. Campbell,<sup>4</sup> C. Buddy Creech,<sup>5</sup> Robert Frencik,<sup>6</sup> Satoshi Kamidani,<sup>1,3</sup> Flor M. Munoz,<sup>7,8</sup> Sharon Nachman,<sup>9</sup> and Paul Spearman<sup>6</sup>

<sup>1</sup>Department of Pediatrics, Emory University School of Medicine, Atlanta, Georgia, USA, <sup>2</sup>Department of Medicine, Emory University School of Medicine, Atlanta, Georgia, USA, <sup>3</sup>Center for Childhood Infections and Vaccines, Children's Healthcare of Atlanta, Atlanta, Georgia, USA, <sup>4</sup>Department of Pediatrics and Center for Vaccine Development and Global Health, University of Maryland School of Medicine, Baltimore, Maryland, USA, <sup>5</sup>Vanderbilt Vaccine Research Program, Department of Pediatrics, Vanderbilt University School of Medicine, Nashville, Tennessee, USA, <sup>6</sup>Cincinnati Children's Hospital Medical Center, Cincinnati, Ohio, USA, <sup>7</sup>Department of Pediatrics, Baylor College of Medicine, Houston, Texas, USA, <sup>8</sup>Department of Molecular Virology and Microbiology, Baylor College of Medicine, Houston, Texas, USA, <sup>9</sup>Department of Pediatrics, The State University of New York (SUNY) Stony Brook; Stony Brook, New York, USA

While adult clinical trials of coronavirus disease 2019 (COVID-19) vaccines have moved quickly into phase 3 clinical trials, clinical trials have not started in children in the United States. The direct COVID-19 impact upon children is greater than that observed for a number of other pathogens for which we now have effective pediatric vaccines. Additionally, the role of children in severe acute respiratory syndrome coronavirus 2 (SARS-CoV-2) transmission has clearly been underappreciated. Carefully conducted phase 2 clinical trials can adequately address potential COVID-19 vaccine safety concerns. Delaying phase 2 vaccine clinical trials in children will delay our recovery from COVID-19 and unnecessarily prolong its impact upon children's education, health, and emotional well-being, and equitable access to opportunities for development and social success. Given the potential direct and indirect benefits of pediatric vaccination, implementation of phase 2 clinical trials for COVID-19 vaccines should begin now.

**Keywords.** SARS-CoV-2; pediatric; immunize; immunization; vaccination.

The US government has launched and invested billions of dollars in a massive effort to safely accelerate coronavirus disease 2019 (COVID-19) vaccine candidates toward licensure at “warp speed.” Development of COVID-19 vaccines has been expedited partly by basic science and vaccine research conducted on related coronaviruses, severe acute respiratory syndrome (SARS) and Middle Eastern respiratory syndrome (MERS) [1]. Conducting in parallel the multiple aspects of clinical trial development further accelerated vaccine development in adults while protecting subject safety. Phase 1 and 2 data are now available for a number of vaccine candidates [2–6], and phase 3 clinical trials have begun.

Despite efforts to advance vaccines for adults at warp speed, COVID-19 vaccine clinical trials for children remain stuck in neutral. Children are infected with severe acute respiratory syndrome coronavirus 2 (SARS-CoV-2), transmit the virus, and suffer COVID-19 complications. Safe and effective vaccines, when given to children, may provide both direct and indirect benefits. At the time that phase 3 adult clinical trials are initiated, data support the initiation of careful pediatric phase 2 clinical

trials to evaluate the safety and immunogenicity of advanced COVID-19 vaccine candidates. These initial pediatric studies should be conducted in parallel with adult efficacy trials, rather than delaying until adult efficacy is established. Additionally, it is incumbent upon us to begin these studies to address the economic, educational, and equity impact of COVID-19.

## POTENTIAL DIRECT AND INDIRECT BENEFIT IN VACCINATING CHILDREN

### Potential for Direct Benefit

Current estimates of US pediatric hospitalizations through 29 August 2020 are 15.8 per 100 000 in children 0–4 years of age and 9.2 per 100 000 in those 5–17 years of age [7]. Although the COVID-19 hospitalization burden is smaller in children than adults [8], hospitalizations rival the prevaccine-era hospitalization burden of other now vaccine-preventable viruses (Table 1). Approximately one-third of hospitalized children with polymerase chain reaction–positive SARS-CoV-2 and up to 80% of those with multisystem inflammatory syndrome in children (MIS-C) are admitted to the intensive care unit [8, 9]. The risk of serious COVID-19 in children (both hospitalizations and MIS-C) occurs with disproportionately higher rates in both Hispanics and Blacks as compared with Whites [8–10]. A pediatric COVID-19 vaccine could dramatically reduce hospitalization and racial disparities from COVID-19.

Children in the United States are dying of COVID-19–related complications; in the first 5 months of the pandemic, 103 children have died in the United States from COVID-19

Received 1 September 2020; editorial decision 15 September 2020; published online 18 September 2020.

Correspondence: E. J. Anderson, Emory University School of Medicine, 2015 Uppergate Dr, Atlanta, GA 30322 (evanderson@emory.edu).

Clinical Infectious Diseases® 2021;73(2):336–40

© The Author(s) 2020. Published by Oxford University Press for the Infectious Diseases Society of America. All rights reserved. For permissions, e-mail: journals.permissions@oup.com.  
DOI: 10.1093/cid/ciaa1425

**Table 1. Numbers of Hospitalizations and Deaths for COVID-19 in Comparison to Varicella, Rubella, Hepatitis A, and Rotavirus in the Prevaccine Era**

| Virus                    | Hospitalizations/Year           | Deaths                         |
|--------------------------|---------------------------------|--------------------------------|
| COVID-19                 | 15.8 per 100 000 ages 0–4 years | 103 children                   |
|                          | 9.2 per 100 000 ages 5–17 years | Age ≤18 years                  |
|                          | Through 11 September 2020 [7]   | Through 11 September 2020 [11] |
| Varicella                | 4–31 per 100 000                | 50 children per year           |
|                          | Age <20 years                   | Age <15 years                  |
|                          | Years 1988–1995 [12]            | Years 1970–1994 [13]           |
| Rubella                  | Not available <sup>a</sup>      | 17 children per year           |
|                          |                                 | All ages                       |
|                          |                                 | Years 1966–1968 [14]           |
| Hepatitis A <sup>b</sup> | 107 hospitalized children       | 3 children per year            |
|                          | Age <15 years                   | Age <20 years                  |
|                          | Year 2005 [15]                  | Years 1990–1995 [16]           |
| Rotavirus                | 55 000–70 000 children          | 20–60 children per year        |
|                          | Age <5 years                    | Age <5 years                   |
|                          | Years 1993–2002 [17, 18]        | Years 1999–2007 [17, 19]       |

Data methods of collection and ages are variable across the pathogens but are summarized by age and year(s) during which data were collected before widespread implementation of a vaccine. Data on the impact of other vaccines have previously been summarized [14].

Abbreviation: COVID-19, coronavirus disease 2019.

<sup>a</sup>Data are not available, to our knowledge, about this outcome before vaccine implementation.

<sup>b</sup>Hepatitis A hospitalization data after implementation of routine vaccination in those ≥2 years of age in 11 states with elevated rates of disease, but before routine hepatitis A vaccination was implemented in all children.

through 9 September 2020 [11]. It is important to recognize that other vaccine-preventable diseases for which vaccination is recommended today resulted in similar or fewer annual pediatric deaths before vaccines became widely utilized (eg, hepatitis A, varicella, rubella, rotavirus) (Table 1) [13,16,17,20]. Additionally, pediatric COVID-19 deaths are rapidly approaching the 110–188 influenza-associated pediatric deaths per season from the past 4 seasons (2016–2020) [21]. The anticipated persistence of SARS-CoV-2 circulation and the burden of COVID-19 hospitalizations and deaths in children justify the development of a pediatric indication for COVID-19 vaccines.

In addition to direct medical benefits, a COVID-19 vaccine could provide direct benefits on childhood education by allowing a safer return to school, a critical factor in children maximizing their potential. The intermittent or complete closure of schools to onsite education threatens to adversely impact that opportunity across all households that cannot provide direct educational oversight and is worse among households without adequate access to online learning—an issue disproportionately affecting racial minorities. In addition to the altered learning environment, social distancing and the lack of extracurricular activities (eg, sports, drama, music, art, social events) impact the emotional and psychological development of children. Thus, an approved COVID-19 vaccine for children could have far-reaching positive ramifications on health and educational equity.

### Potential for Indirect Benefits From Pediatric COVID-19 Vaccination

Vaccinated children would receive potential direct impact from a COVID-19 vaccine, but substantial potential for indirect effects of implementing a vaccine in children should also be recognized, as has been observed with hepatitis A, rotavirus, pneumococcus, rubella, and potentially influenza [22–29]. Marked declines in adult pneumococcal disease occurred after implementation of 7-valent pediatric pneumococcal conjugate vaccine (PCV) [26]. Additional pronounced impact occurred after implementation of PCV-13 [25], such that routine PCV-13 vaccination is no longer routinely recommended in adults 65 years of age or older [30]. The potential for an indirect impact depends upon the ability of the vaccine to prevent transmission of a pathogen to unvaccinated populations. Although it is unknown whether this will be the case for COVID-19, recent nonhuman primate data in which animals received COVID-19 vaccination followed by SARS-CoV-2 challenge demonstrated declines in both disease and viral titers in the nose [31]. These nonhuman primate challenge data in conjunction with high neutralizing antibodies achieved in early human trials provide strong support for the potential of a direct and indirect impact of vaccination.

Vaccination of children against COVID-19 may mimic the indirect benefits previously identified with other vaccines [22, 23]. Data from a study of close contacts of SARS-CoV-2–infected patients suggest that, while children were less likely to have severe symptoms, they were just as likely to be infected as adults (rate of ~7% in both) [32]. Several studies suggest that the viral titers in the respiratory tracts of children are greater than those in adults [33, 34]. A large contact-tracing study of COVID-19 cases, conducted while schools were closed in South Korea, supports the concept that older children can transmit COVID-19, as the highest COVID-19 rate (18.6%) occurred in household contacts of those 10–19 years of age [35]. An outbreak at a summer camp reported an attack rate of 44%, demonstrating that children of all ages were susceptible to SARS-CoV-2 infection and that they may play a role in transmission [36]. Recent modeling demonstrated that US school closures were temporally associated with overall decreased COVID-19 incidence and mortality [37]. Approximately 3.8 million children are born in the United States annually; all are naive to COVID-19. Without a COVID-19 vaccine, children will likely serve as a reservoir, which would undermine efforts to end the pandemic. Until all children can more safely return to school and parents can return to full-time work, it is difficult to imagine that the economy can completely recover.

### ADDRESSING POTENTIAL COVID-19 VACCINE SAFETY CONCERNS IN CHILDREN

Ensuring the safety of potential vaccine candidates is paramount, particularly in children. Data in adults show that all COVID-19 vaccines evaluated thus far have local (eg, pain,

redness, swelling, induration) and systemic (eg, fever, chills, myalgia) reactogenicity [2–4, 6, 38, 39]. Reactogenicity is self-limited, treatable, and reflects a typical innate immune response to antigen exposure. More important is vaccine safety. Uncommon, unexpected safety events can occur after vaccination, such as thrombocytopenia after the measles, mumps, and rubella (MMR) vaccination; febrile seizures with certain vaccines; and intussusception associated with the original tetravalent rotavirus vaccine [40–42]. All vaccines have the potential for unknown and uncommon safety problems. The potential benefits and risks of new vaccines should be considered. A carefully designed clinical development plan can ensure that potential benefits outweigh risks. This approach has been successful in moving vaccines against respiratory syncytial virus (RSV), cytomegalovirus, and other pathogens into clinical trials. The vaccine safety network within the United States includes several postmarketing surveillance systems for all vaccines to detect rare adverse events that were not detected prelicensure [43]. Importantly, withdrawal for safety has only occurred once, with the tetravalent rotavirus vaccine [44]. Thus, the process of obtaining Food and Drug Administration (FDA) licensure and postlicensure safety surveillance should remain rigorous and robust in ensuring safe vaccines. Statements by the FDA to date suggest that this will remain the case for COVID-19 vaccines [45].

Vaccine-associated immune-mediated enhanced disease (VAED), while a theoretical concern, is a process that is considered unlikely to occur with SARS-CoV-2. VAED may be associated with 2 different mechanisms of action [46]. Antibody-dependent enhancement (ADE), as has been observed with dengue, occurs when a vaccine-induced antibody paradoxically mediates increased viral entry [46], particularly with exposure to a different strain of virus. Although minor mutations have occurred in circulating SARS-CoV-2, including the D614G [47], available data do not suggest that major mutations have emerged. Vaccine-associated enhancement of respiratory disease (VAERD) occurred in association with use of a formalin-inactivated RSV vaccine in the 1960s. Investigations into the pathophysiology suggest that this was due to nonneutralizing antibodies and a predominantly T-helper (Th) 2–biased response [46]. Importantly, all COVID-19 vaccines with available data induce high levels of neutralizing antibodies, and some also generate a Th1 response [2–4, 6, 39, 48].

The final safety issue that has been raised is the potential for induction of MIS-C associated with COVID-19. The timing of MIS-C (frequently weeks after infection) and the detection of neutralizing and receptor-binding-domain antibodies at the time of illness suggest that this might be an immune-mediated injury triggered by SARS-CoV-2 infection [9, 49]. Given the viremia that is known to occur with COVID-19 [50] and the response of most patients to brief courses of immunomodulators (eg, steroids), it may be due to immunological recognition of

viral antigens (or live virus) rather than triggering of an autoimmune condition. Although not powered to detect rare events, data from early clinical studies in humans have not yet identified any cases of ADE, or VAERD [2–4, 38, 39]. A vaccine that prevents infection could also prevent MIS-C; available data suggest that vaccines prevent COVID-19 in a nonhuman primate challenge model without enhancement of disease [31, 51, 52]. Large phase 3 efficacy trials conducted in adults may provide additional insights into vaccine-elicited immunity and enhanced disease, and such data would be anticipated to be available during the phase 2 pediatric clinical trials. Given the rarity of MIS-C with natural infection, any risk is unlikely to be resolved even with carefully conducted, large pediatric clinical trials, and ongoing surveillance for MIS-C will be necessary even after a vaccine approval.

## RECOMMENDATIONS FOR ADVANCING COVID-19 VACCINES IN CHILDREN

The current default position, waiting until data from adult efficacy studies are available, will unduly delay phase 2 clinical trials of leading COVID-19 vaccines in children, resulting in additional pediatric hospitalizations and deaths. Data are now available from early-phase adult clinical trials [2–6]. Pediatric clinical trials of leading vaccine candidates can safely be initiated now. To establish safety, trials should start with adolescents and older children before expanding to younger children. The strategy of age de-escalating trials to bridge vaccines from adult studies to children is one that has been commonly used in the past to ensure early identification of safety signals while minimizing risks, establishing dosing, and evaluating immune responses. Similar to adult studies, it will take time to conduct these studies safely in children.

Moving forward now with pediatric COVID-19 vaccine trials will help prevent delays in obtaining a pediatric indication from the US FDA. The Pediatric Research Equity Act (PREA, section 505B of the Federal Food, Drug, and Cosmetic Act [FD&C Act]; 21 USC 355c) requires manufacturers to conduct vaccine studies of safety and effectiveness in children. Although the timing of pediatric studies is not delineated in the Act, we believe the FDA, funding agencies, investigators, and manufacturers should join to initiate these studies now. The FDA clarified that, to ensure compliance with 21 CFR part 50, subpart D, considerations of the prospect of direct benefit and acceptable risk to support initiation of pediatric studies and the appropriate design and endpoints for pediatric studies should be discussed in the context of specific vaccine-development programs [53].

Despite FDA guidance and requirements of the law, to our knowledge no studies of COVID-19 vaccines in children have been developed or initiated in the United States. It would be beneficial, in our opinion, for the funders and overseers of US vaccine efforts (eg, Operation Warp Speed, the US FDA, manufacturers) to ensure that pediatric studies of COVID-19

vaccines begin at the same time that vaccines move into phase 3 adult clinical trials. To assist industry and government sponsors in moving forward with pediatric COVID-19 trials, the Infectious Diseases Clinical Research Consortium, in partnership with the Division of Microbiology and Infectious Diseases of the National Institutes of Health, convened a panel of vaccine experts to develop a pediatric COVID-19 vaccine protocol template. The template is adaptable to multiple vaccines currently under evaluation in adults and could standardize the approach and endpoints across vaccine manufacturers. It features an age de-escalation strategy, incorporating multiple provisions that will allow these vaccines to be safely evaluated in adolescents, young children, and infants.

## CONCLUSIONS

Children are at substantial risk of COVID-19. Delays in starting phase 2 vaccine clinical trials in children will delay our recovery from COVID-19 and unnecessarily prolong its impact upon children's health and emotional well-being, their education, and equitable access to opportunities for development and social success, as well as the country's economy. Understanding the safety, immunogenicity, and efficacy of COVID-19 vaccines in children is critical to protect children and adults. For children, a vaccine has the added benefit of returning them safely to school and extracurricular activities and allowing them to engage with their world face-to-face once again. Ensuring acceleration of vaccine clinical trials to warp speed for children will be critical in making this our future reality.

## Notes

**Acknowledgments.** E. J. A. acknowledges Catherine Barnes Anderson for her insightful comments and helpful discussion of multiple aspects of this manuscript.

**Potential conflicts of interest.** All co-authors receive funding to their institutions from the National Institutes of Health to conduct COVID-19 vaccine and other vaccine clinical trials. E. J. A. has received personal fees from AbbVie, Pfizer, and Sanofi-Pasteur for consulting, and his institution receives funds to conduct clinical research unrelated to this manuscript from MedImmune, Regeneron, PaxVax, Pfizer, GSK, Merck, Novavax, Sanofi-Pasteur, Janssen, and Micron. He also serves on a safety monitoring board for Kentucky BioProcessing, Inc. J. D. C.'s institution receives funds to conduct clinical research unrelated to this manuscript from Merck, GSK, Pfizer, and Sanofi Pasteur. He is currently an investigator on federally funded COVID-19 research with products manufactured by Moderna, Gilead, Eli Lilly, and EMD Serono. His institution receives grants from Moderna, outside the submitted work. He serves pro bono on a data and safety monitoring board for Sanaria. C. B. C. has received consulting fees from Karius, Horizon Pharma, Premier, and Astellas Pharmaceuticals. His institution has received funds to conduct clinical research unrelated to this manuscript from Merck Vaccines. He also serves on a data and safety monitoring board for Astellas Pharmaceuticals. Additionally, he has a patent for staphylococcal antibodies (16491271) pending. F. M. M. has conducted research supported by Gilead, Novavax, Janssen, Biocryst, and Merck. She also serves on the safety monitoring board for Pfizer, Moderna, Meissa Vaccines, and Viometrix. All other authors report no potential conflicts. All authors have submitted the ICMJE Form for Disclosure of Potential Conflicts of Interest. Conflicts that the editors consider relevant to the content of the manuscript have been disclosed.

## References

- Corbett KS, Edwards D, Leist SR, et al. SARS-CoV-2 mRNA vaccine development enabled by prototype pathogen preparedness. *bioRxiv* 2020. PMID: 32756549. doi:10.1038/s41586-020-2622-0.
- Jackson LA, Roberts PC, Graham BS. A SARS-CoV-2 mRNA vaccine—preliminary report [reply]. *N Engl J Med* 2020; 383:1191–2.
- Mulligan MJ, Lyke KE, Kitchin N, et al. Phase 1/2 study to describe the safety and immunogenicity of a COVID-19 RNA vaccine candidate (BNT162b1) in adults 18 to 55 years of age: interim report. *medRxiv* 2020. PMID: 32785213. doi:10.1038/s41586-020-2639-4.
- Folegatti PM, Ewer KJ, Aley PK, et al; Oxford COVID Vaccine Trial Group. Safety and immunogenicity of the ChAdOx1 nCoV-19 vaccine against SARS-CoV-2: a preliminary report of a phase 1/2, single-blind, randomised controlled trial. *Lancet* 2020; 396:467–78.
- Walsh EE, Frenck R, Falsey AR, et al. RNA-based COVID-19 vaccine BNT162b2 selected for a pivotal efficacy study. *medRxiv* 2020. PMID: 32839784. doi: 10.1101/2020.08.17.20176651.
- Keech C, Albert G, Cho I, et al. Phase 1–2 trial of a SARS-CoV-2 recombinant spike protein nanoparticle vaccine. *N Engl J Med* 2020. doi:10.1056/NEJMoa2026920.
- Centers for Disease Control and Prevention. COVID-NET: a weekly summary of U.S. COVID-19 hospitalization data. Available at: [https://gis.cdc.gov/grasp/COVIDNet/COVID19\\_3.html](https://gis.cdc.gov/grasp/COVIDNet/COVID19_3.html). Accessed 11 September 2020.
- Kim L, Whitaker M, O'Halloran A, et al; COVID-NET Surveillance Team. Hospitalization rates and characteristics of children aged <18 years hospitalized with laboratory-confirmed COVID-19—COVID-NET, 14 states, March 1–July 25, 2020. *MMWR Morb Mortal Wkly Rep* 2020; 69:1081–8.
- Feldstein LR, Rose EB, Horwitz SM, et al; Overcoming COVID-19 Investigators; CDC COVID-19 Response Team. Multisystem inflammatory syndrome in U.S. children and adolescents. *N Engl J Med* 2020; 383:334–46.
- Goyal MK, Simpson JN, Boyle MD, et al. Racial/ethnic and socioeconomic disparities of SARS-CoV-2 infection among children. *Pediatrics* 2020. PMID: 32759379. doi:10.1542/peds.2020-009951.
- Centers for Disease Control and Prevention. Provisional COVID-19 deaths: focus on ages 0–18 years. Available at: <https://data.cdc.gov/NCHS/Provisional-COVID-19-Deaths-Focus-on-Ages-0-18-Yea/nr4s-juj3>. Accessed 11 September 2020.
- Galil K, Brown C, Lin F, Seward J. Hospitalizations for varicella in the United States, 1988 to 1999. *Pediatr Infect Dis J* 2002; 21:931–5.
- Meyer PA, Seward JF, Jumaan AO, Wharton M. Varicella mortality: trends before vaccine licensure in the United States, 1970–1994. *J Infect Dis* 2000; 182:383–90.
- Roush SW, Murphy TV; Vaccine-Preventable Disease Table Working Group. Historical comparisons of morbidity and mortality for vaccine-preventable diseases in the United States. *JAMA* 2007; 298:2155–63.
- Wasley A, Miller JT, Finelli L. Surveillance for acute viral hepatitis—United States, 2005. *MMWR Surveill Summ* 2007; 56:1–24.
- Vogt TM, Wise ME, Bell BP, Finelli L. Declining hepatitis A mortality in the United States during the era of hepatitis A vaccination. *J Infect Dis* 2008; 197:1282–8.
- Parashar UD, Alexander JP, Glass RI; Advisory Committee on Immunization Practices; Centers for Disease Control and Prevention. Prevention of rotavirus gastroenteritis among infants and children: recommendations of the Advisory Committee on Immunization Practices (ACIP). *MMWR Recomm Rep* 2006; 55:1–13.
- Charles MD, Holman RC, Curns AT, Parashar UD, Glass RI, Bresee JS. Hospitalizations associated with rotavirus gastroenteritis in the United States, 1993–2002. *Pediatr Infect Dis J* 2006; 25:489–93. PMID:16732145.
- Desai R, Esposito DH, Lees C, et al. Rotavirus-coded deaths in children, United States, 1999–2007. *Pediatr Infect Dis J* 2011; 30:986–8.
- Esposito DH, Holman RC, Haberling DL, et al. Baseline estimates of diarrhea-associated mortality among United States children before rotavirus vaccine introduction. *Pediatr Infect Dis J* 2011; 30:942–7.
- Centers for Disease Control and Prevention. Influenza-associated pediatric mortality. Available at: <https://gis.cdc.gov/grasp/fluview/pefdfludeath.html>. Accessed 11 September 2020.
- Anderson EJ, Daugherty MA, Pickering LK, Orenstein WA, Yogev R. Protecting the community through child vaccination. *Clin Infect Dis* 2018; 67:464–71.
- Kao CM, Orenstein WA, Anderson EJ. The importance of advancing SARS-CoV-2 vaccines in children. *Clin Infect Dis* 2021; 72:515–8.
- Lopman BA, Curns AT, Yen C, Parashar UD. Infant rotavirus vaccination may provide indirect protection to older children and adults in the United States. *J Infect Dis* 2011; 204:980–6.
- Moore MR, Link-Gelles R, Schaffner W, et al. Effect of use of 13-valent pneumococcal conjugate vaccine in children on invasive pneumococcal disease in

- children and adults in the USA: analysis of multisite, population-based surveillance. *Lancet Infect Dis* **2015**; 15:301–9.
26. Whitney CG, Farley MM, Hadler J, et al; Active Bacterial Core Surveillance of the Emerging Infections Program Network. Decline in invasive pneumococcal disease after the introduction of protein-polysaccharide conjugate vaccine. *N Engl J Med* **2003**; 348:1737–46. PMID:12724479.
  27. Piedra PA, Gaglani MJ, Kozinetz CA, et al. Herd immunity in adults against influenza-related illnesses with use of the trivalent-live attenuated influenza vaccine (CAIV-T) in children. *Vaccine* **2005**; 23:1540–8. PMID:15694506.
  28. Reichert TA, Sugaya N, Fedson DS, Glezen WP, Simonsen L, Tashiro M. The Japanese experience with vaccinating schoolchildren against influenza. *N Engl J Med* **2001**; 344:889–96. PMID:11259722.
  29. Loeb M, Russell ML, Moss L, et al. Effect of influenza vaccination of children on infection rates in Hutterite communities: a randomized trial. *JAMA* **2010**; 303:943–50. PMID:20215608.
  30. Matanock A, Lee G, Gierke R, Kobayashi M, Leidner A, Pilishvili T. Use of 13-valent pneumococcal conjugate vaccine and 23-valent pneumococcal polysaccharide vaccine among adults aged  $\geq 65$  years: updated Recommendations of the Advisory Committee on Immunization Practices. *MMWR Morb Mortal Wkly Rep* **2019**; 68:1069–75.
  31. Corbett KS, Flynn B, Foulds KE, et al. Evaluation of the mRNA-1273 vaccine against SARS-CoV-2 in nonhuman primates. *N Engl J Med* **2020**. doi:10.1056/NEJMoa2024671.
  32. Bi Q, Wu Y, Mei S, et al. Epidemiology and transmission of COVID-19 in 391 cases and 1286 of their close contacts in Shenzhen, China: a retrospective cohort study. *Lancet Infect Dis* **2020**; 20:911–9. PMID: 32353347.
  33. Yonker LM, Neilan AM, Bartsch Y, et al. Pediatric SARS-CoV-2: clinical presentation, infectivity, and immune responses. *J Pediatr* **2020**. PMID: 32827525. doi:10.1016/j.jpeds.2020.08.037.
  34. Heald-Sargent T, Muller WJ, Zheng X, Rippe J, Patel AB, Kocielek LK. Age-related differences in nasopharyngeal severe acute respiratory syndrome coronavirus 2 (SARS-CoV-2) levels in patients with mild to moderate coronavirus disease 2019 (COVID-19). *JAMA Pediatr* **2020**. PMID: 32745201. doi:10.1001/jamapediatrics.2020.3651.
  35. Park YJ, Choe YJ, Park O, et al. Contact tracing during coronavirus disease outbreak, South Korea, 2020. *Emerg Infect Dis* **2020**; 26:2465–8. PMID: 32673193.
  36. Szablewski CM, Chang KT, Brown MM, et al. SARS-CoV-2 transmission and infection among attendees of an overnight camp—Georgia, June 2020. *MMWR Morb Mortal Wkly Rep* **2020**; 69:1023–5.
  37. Auger KA, Shah SS, Richardson T, et al. Association between statewide school closure and COVID-19 incidence and mortality in the US. *JAMA* **2020**; 324:859–70.
  38. Zhu FC, Li YH, Guan XH, et al. Safety, tolerability, and immunogenicity of a recombinant adenovirus type-5 vectored COVID-19 vaccine: a dose-escalation, open-label, non-randomised, first-in-human trial. *Lancet* **2020**; 395:1845–54.
  39. Keech C, Albert G, Reed P, et al. First-in-human trial of a SARS CoV 2 recombinant spike protein nanoparticle vaccine. *medRxiv* **2020**; doi: 2020.08.05.20168435.
  40. France EK, Glanz J, Xu S, et al; Vaccine Safety Datalink Team. Risk of immune thrombocytopenic purpura after measles-mumps-rubella immunization in children. *Pediatrics* **2008**; 121:e687–92.
  41. Duffy J, Weintraub E, Hambidge SJ, et al. Febrile seizure risk after vaccination in children 6 to 23 months. *Pediatrics* **2016**; 138:e20160320. PMID: 27273711. doi:10.1542/peds.2016-0320.
  42. Murphy TV, Gargiullo PM, Massoudi MS, et al; Rotavirus Intussusception Investigation Team. Intussusception among infants given an oral rotavirus vaccine. *N Engl J Med* **2001**; 344:564–72.
  43. Edwards KM, Orenstein WA. Anticipating severe acute respiratory syndrome coronavirus 2 vaccine testing, licensure, and recommendations for use. *J Pediatr* **2020**; 224:124–8.
  44. Tau N, Yahav D, Shepshelovich D. Postmarketing safety of vaccines approved by the U.S. Food and Drug Administration: a cohort study. *Ann Intern Med* **2020**; 173:445–9. PMID:32716700.
  45. Food and Drug Administration. Coronavirus (COVID-19) update: FDA takes action to help facilitate timely development of safe, effective COVID-19 vaccines. Available at: <https://www.fda.gov/news-events/press-announcements/coronavirus-covid-19-update-fda-takes-action-help-facilitate-timely-development-safe-effective-covid>. Accessed 29 August 2020.
  46. Graham BS. Rapid COVID-19 vaccine development. *Science* **2020**; 368:945–6.
  47. Korber B, Fischer WM, Gnanakaran S, et al; Sheffield COVID-19 Genomics Group. Tracking changes in SARS-CoV-2 spike: evidence that D614G increases infectivity of the COVID-19 virus. *Cell* **2020**; 182:812–27, e19. PMID: 32697968. doi:10.1016/j.cell.2020.06.043.
  48. Zhu FC, Li YH, Guan XH, et al. Safety, tolerability, and immunogenicity of a recombinant adenovirus type-5 vectored COVID-19 vaccine: a dose-escalation, open-label, non-randomised, first-in-human trial. *Lancet* **2020**; 395:1845–54.
  49. Rostad CA, Chahroudi A, Mantus G, et al. Quantitative SARS-CoV-2 serology in children with multisystem inflammatory syndrome (MIS-C). *Pediatrics* **2020**. PMID:32879033. doi:10.1542/peds.2020-018242.
  50. Zheng S, Fan J, Yu F, et al. Viral load dynamics and disease severity in patients infected with SARS-CoV-2 in Zhejiang province, China, January–March 2020: retrospective cohort study. *BMJ* **2020**; 369:m1443. PMID:32317267. doi:10.1136/bmj.m1443.
  51. Yu J, Tostanoski LH, Peter L, et al. DNA vaccine protection against SARS-CoV-2 in rhesus macaques. *Science* **2020**; 369:806–11.
  52. Mercado NB, Zahn R, Wegmann F, et al. Single-shot Ad26 vaccine protects against SARS-CoV-2 in rhesus macaques. *Nature* **2020**. PMID:32731257. doi:10.1038/s41586-020-2607-z.
  53. US Department of Health and Human Services. Development and licensure of vaccines to prevent COVID-19. Guidance for industry. Available at: <https://www.fda.gov/media/139638/download>. Accessed 16 August 2020.
